# Supplementary material
Source: ML conference proceedings conference paper supplement (https://openreview.net/forum?id=dIgCPoy8E3)
Supplement: supplementary_material [file attachment]

# Supplementary materials of Cross-dataset Sensor Alignment: Making Visual 3D Object Detector Generalize

Anonymous Author(s)

Affiliation

Address

email

1 In this Supplementary Material, we provide details omitted in the main paper.

2 Section 1: brief introduction of datasets.

3 Section 2: data format conversion (maybe include dataset[[]])

4 Section 3: Details of training settings

5 Section 4: 3D object detection using BEVDet

6 Section 5: additional object detection results using DETR3D

## 7 1 Datasets

8 **Argoverse2.** The Argoverse2 dataset [1] is collected across six cities in the US, including Pittsburgh,  
9 Detroit, Austin, Palo Alto, Miami, and Washington D.C. It encompasses data captured in various  
10 weather conditions and at different times of the day. The dataset includes images from two grayscale  
11 stereo cameras and seven cameras that provide 360-degree coverage. It offers 3D annotations at  
12 a frame rate of 10Hz. To align with the frame rate in the nuScenes dataset, we sub-sample the  
13 Argoverse2 dataset, resulting in 21,982 frames for training and 4,705 frames for validation, with a  
14 frame rate of 2Hz. *Yicheng: maybe we need to give a reason why?*

15 **KITTI.** The KITTI [2] object detection benchmark consists of 7,481 frames for training. These  
16 scenes were captured in clear weather and during daytime around Karlsruhe, Germany. The dataset  
17 provides images from two RGB cameras and two grayscale cameras, forming 2 stereo pairs. For our  
18 study, we solely utilize the left RGB camera. Following [3], we separate the data into 3,712 training  
19 frames and 3,769 validation frames.

20 **KITTI-360.** The KITTI-360 dataset [4] is significantly larger than KITTI, comprising 61,569 valid  
21 frames with 3D annotations at a frame rate of 10Hz. The labeled data is obtained from nine video  
22 clips. To create a training and validation split, we utilize the first 80% of each video clip for training  
23 and the remaining 20% for validation. This results in a training set containing 49,253 frames and a  
24 validation set containing 12,316 frames. Unlike KITTI, the KITTI-360 dataset provides RGB images  
25 from two frontal perspective cameras and two side fish-eye cameras. Similar to the KITTI settings,  
26 we exclusively use the images from the left frontal camera in our study.

27 **nuScenes.** The nuScenes datasets [5] contains 28130 training and 6019 validation key frames. The  
28 scenes are collected around Boston, USA and Singapore in multiple weathers and during different  
29 time frame. For each frame, the dataset provides six images that collectively cover a 360-degree view.

30 **Lyft.** The Lyft Level 5 dataset [6] consists of 22,680 annotated frames captured around Palo Alto,  
31 USA, during clear weather conditions and daytime. Each frame within the dataset includes images  
32 from six surrounding view cameras as well as a long-focal-length frontal camera. It is important to  
33 mention that this dataset is collected using 20 independent vehicles, and the surrounding view images

34 have two different resolutions. Following the approach outlined in MMDetection3D[], we partition  
35 the dataset into 18,900 frames for training and 3,780 frames for validation.

36 **Waymo.** The Waymo [7] dataset is collected across Phoenix, Mountain View, and San Francisco,  
37 encompassing various weather conditions and different times of the day. It includes images from five  
38 cameras and offers 3D annotations at a frame rate of 10Hz. The training set consists of 158,081 frames,  
39 while the validation set contains 39,990 frames. To align with a 2Hz frame rate, we sub-sample the  
40 dataset, resulting in 31,616 frames for training and 7,998 frames for validation.

## 41 2 Converting Datasets into a Unified Format

42 In this section, we provide a detailed explanation of how we convert Argoverse2, KITTI, KITTI-360,  
43 Lyft, nuScenes, and Waymo datasets into a unified format. We specifically focus on the issues related  
44 to coordinate systems and 3D annotations that arise when merging these datasets. We converting data  
45 under MMDetection3D v1.1.0.

### 46 2.1 Coordinate systems

47 Regarding sensor configuration, the datasets differ in terms of three types of coordinate systems: ego  
48 frame, LiDAR frame, and camera frame. The definition of camera is clear so we primarily focus  
49 on the former two. Each dataset typically includes at least one LiDAR mounted on the roof of the  
50 vehicle. The origin of the LiDAR frame is commonly located at the center of the top LiDAR if no  
51 specification.

52 Ego frame is more confusing as the origin is defined differently across the datasets. In Argoverse2,  
53 nuScenes and Waymo, the ego origin is located at the center of the rear axle of the car. In Argoverse2,  
54 it is approximately 33cm above the ground, while in the latter two datasets, it is projected onto the  
55 ground plane. Lyft does not explicitly specify the location; however, based on the statistical analysis  
56 of 3D annotations, it is also considered to be on the ground. These four datasets have corrected their  
57 axes, ensuring that the z-axis consistently points upwards from the road surface. On the other hand,  
58 for KITTI and KITTI-360, the ego frame is defined by the Inertial Measurement Unit (IMU). Across  
59 all the datasets, the x-axis aligns with the car’s longitudinal direction, while the y-axis points to the  
60 left.

61 Regarding LiDAR point clouds and 3D annotations, Argoverse2 and Waymo define them in the ego  
62 frame, while KITTI, KITTI-360, Lyft, and nuScenes define them in the LiDAR frame. Consequently,  
63 during training, we consider the LiDAR centers of the latter datasets as the ‘ego centers’.

64 In terms of ego frame alignment, for Argoverse2, KITTI, and KITTI-360, we simply lower their ego  
65 centers by 0.33m, 1.73m, and 1.73m, respectively, to align them with the road surface. For Lyft and  
66 nuScenes, we transform the entire coordinate system to their original ego frames, which are also  
67 pressed against the road.

### 68 2.2 Object filtering

69 To ensure consistency and data quality, we discard object annotations that fall outside the camera  
70 view. This is accomplished by projecting the eight corners of each object’s 3D bounding box onto the  
71 image plane. If all eight corners are outside the image boundary, the object annotation is removed.  
72 Additionally, we filter annotations based on a specific range in the x, y, and z coordinates, namely  
73  $[-51.2, 51.2] \times [-51.2, 51.2] \times [-5.0, 4.0]$ . As every dataset includes LiDAR data, we also discard  
74 annotations that have no LiDAR points within the 3D bounding box since they may be occluded.

### 75 2.3 Merging categories

76 To unify the category labels across datasets, we merge the categories within each dataset into three  
77 classes: vehicle, pedestrian, and bicycle. This taxonomy closely resembles Waymo’s classification,

Table 1: Cross-dataset testing results of BEVDet[9] trained on single dataset.

| Setting | src/dst | N    | A    | L    | K    | K360 | W    | avg. |
|---------|---------|------|------|------|------|------|------|------|
| Direct  | N       | 25.4 | 0.0  | 0.1  | 0.0  | 0.0  | 0.0  | 4.2  |
|         | A       | 0.0  | 29.3 | 0.0  | 0.0  | 0.0  | 3.6  | 5.5  |
|         | L       | 0.0  | 0.0  | 28.4 | 0.1  | 0.0  | 0.0  | 4.8  |
|         | K       | 0.0  | 0.0  | 0.1  | 11.7 | 0.4  | 0.0  | 2.0  |
|         | K360    | 0.0  | 0.0  | 0.1  | 0.6  | 18.4 | 0.0  | 3.2  |
|         | W       | 0.0  | 2.2  | 0.0  | 0.0  | 0.0  | 39.0 | 6.9  |

Table 2: Multi-dataset training results by BEVDet

| Setting | src/dst | N    | A    | L    | K    | K360 | W    | avg. |
|---------|---------|------|------|------|------|------|------|------|
| Direct  | N       | 25.4 | 0.0  | 0.1  | 0.0  | 0.0  | 0.0  | 4.2  |
|         | +A      | 26.5 | 31.1 | 0.1  | 0.0  | 0.0  | 1.5  | 9.9  |
|         | +L      | 27.1 | 32.4 | 31.5 | 0.2  | 0.1  | 2.8  | 15.7 |
|         | +K      | 28.1 | 32.9 | 32.9 | 22.2 | 0.3  | 2.2  | 19.8 |
|         | +K360   | 26.8 | 33.5 | 32.8 | 27.0 | 21.4 | 3.1  | 24.1 |
|         | +W      | 29.2 | 36.7 | 33.9 | 28.8 | 22.0 | 44.5 | 32.5 |

but with a little difference in the bicycle category. Waymo excludes bicycles without a rider, whereas we include such objects when relabeling the other datasets. Table ?? shows the mapping of all categories to the three classes. Any types not listed in the table are discarded during the merging process.

### 3 Training Details

For DETR3D, we use the original training policy, while for BEVDet, we use adamW[8] with weight decay  $1 \times 10^{-7}$  as optimizer, and train it for 24 epochs with batch size 64 and initial learning rate  $2 \times 10^{-4}$ , which will be decreased 10 times on 20th and 24th epoch.

### 4 BEVDet Results

We present object detection results using the BEVDet model, which leverages depth estimation to project 2D image features back to 3D space. In Table 1, we observe that BEVDet achieves favorable performance when trained and tested within the same dataset. We also see a clear performance drop when training a model on one dataset and evaluating it on others. Interestingly, this performance drop is more severe compared to the DETR3D detector in many cases. We surmise that the dense feature projection operation makes the model more prone to domain gaps across datasets. Consequently, BEVDet becomes highly reliant on data augmentation techniques. Table 2 demonstrates a similar trend when considering the results from a multi-dataset perspective.

### 5 Additional Results from DETR3D

In this section, we first provide additional results on monocular 3D detection using DETR3D.

#### 5.1 Ablation studies by cropping the input images

To investigate whether the model relies on other visual cues for object detection, we conduct an experiment where we crop the input images at different positions during testing. In Table 6, we find no performance drop in DETR3D, whereas BEVDet shows a substantial decrease. This indicates that DETR3D does not rely on objects' position in the images. On the other hand, BEVDet, which

Table 3: Ablation study of synchronizing focal length to different values.

| Train | focal length | N    | A    | L    | K    | K360 | W    |
|-------|--------------|------|------|------|------|------|------|
| N     | not synced   | 36.3 | 0.8  | 1.8  | 0.0  | 0.0  | 1.1  |
|       | 1260         | 35.7 | 21.9 | 13.8 | 27.1 | 16.9 | 19.2 |
|       | 2070         | 40.8 | 25.5 | 18.6 | 29.7 | 18.0 | 23.4 |
|       | 3100         | 41.7 | 26.2 | 18.7 | 28.5 | 17.7 | 25.8 |
|       | 4140         | 43.3 | 26.4 | 19.4 | 31.8 | 17.5 | 26.3 |
| A     | not synced   | 0.2  | 48.0 | 0.1  | 0.0  | 0.0  | 17.4 |
|       | 1780         | 11.8 | 46.8 | 7.2  | 6.4  | 5.4  | 38.4 |
|       | 2070         | 13.2 | 51.4 | 7.5  | 6.6  | 4.6  | 38.8 |
|       | 3100         | 12.1 | 51.1 | 8.9  | 7.5  | 5.1  | 40.7 |
|       | 4140         | 11.5 | 53.9 | 9.2  | 6.1  | 4.0  | 40.9 |
| L     | not synced   | 0.5  | 0.1  | 37.3 | 0.4  | 0.0  | 0.1  |
|       | 2070         | 1.0  | 1.3  | 44.0 | 8.1  | 5.7  | 1.5  |
|       | 3100         | 1.1  | 1.3  | 41.0 | 8.2  | 4.8  | 1.4  |
|       | 4140         | 1.0  | 1.6  | 42.9 | 10.5 | 3.2  | 1.6  |
| K360  | not synced   | 0.1  | 0.2  | 0.0  | 3.2  | 26.1 | 0.1  |
|       | 550          | 8.2  | 4.5  | 3.3  | 18.4 | 25.9 | 5.5  |
|       | 2070         | 14.6 | 14.7 | 7.3  | 34.6 | 34.7 | 8.2  |
|       | 3100         | 14.0 | 15.4 | 9.4  | 33.6 | 35.9 | 7.5  |
| W     | not synced   | 0.1  | 8.9  | 0.0  | 0.0  | 0.0  | 58.8 |
|       | 2070         | 14.5 | 37.8 | 14.3 | 9.4  | 5.6  | 57.7 |
|       | 3100         | 14.6 | 38.1 | 13.6 | 7.7  | 3.2  | 62.6 |
|       | 5170         | 10.1 | 38.7 | 10.7 | 8.8  | 2.0  | 62.1 |

incorporates a depth network in its architecture, is more reliant on this kind of pictorial cues, as suggested in prior work (Dijk et al., 2019) [reference].

## 5.2 Synchronize focal length to different values

To further investigate the intrinsic synchronization module, we perform an ablation study by increasing the synchronized focal length value during both training and testing. In Table 3, we observe that enlarging the images does improve mAP; however, the extent of improvement diminishes as the input image size increases. We argue that this phenomenon can be attributed to the fact that smaller objects become easier to detect in larger images.

## 5.3 Ablation studies on sensor alignment approaches

We evaluate the combinations of the modules on all datasets and report the results in Table 4. We observe that each component contributes to the overall performance; however, it is only after aligning the intrinsic parameters that the extrinsic and ego coordinate system start to impact the detection performance. While the Extrinsic Aware Module (EAM) may cause a drop in performance, we argue that this module provides robustness in real-world scenarios where the extrinsic parameters are subject to change.

We evaluate various combinations of modules across all datasets and present the results in Table 4. We observe that each component contributes to the overall performance; however, it is only after aligning the intrinsic parameters that the extrinsic and ego coordinate system start to impact the detection performance. While the Extrinsic Aware Module (EAM) may cause a drop in performance, we argue that this module provides extrinsic robustness in real-world scenarios.

## 5.4 Multi-dataset training beginning with Waymo

Table 5, where we begin with Waymo as the first dataset. It is worth noting that the order of dataset addition does not affect the observations made in the main paper. Here, KITTI-360 drags down

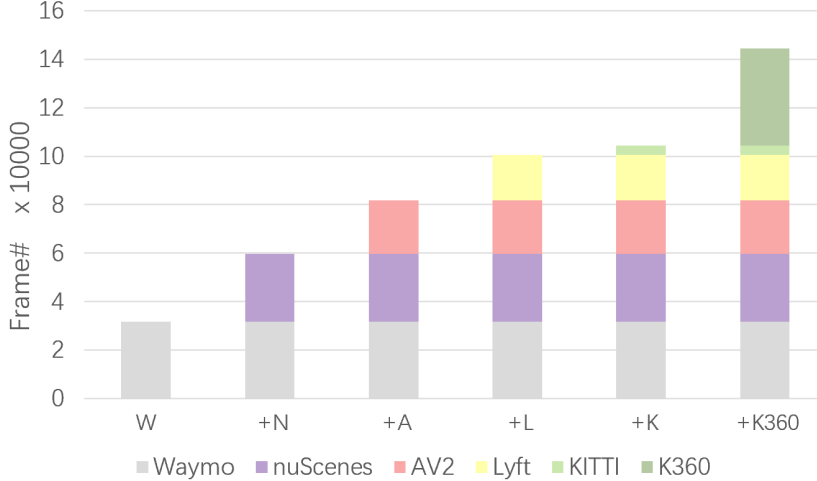

Figure 1: Data volume of each dataset under monocular detection setting

Table 4: Ablation study on the effectiveness of each module in sensor alignment approaches. All models are trained on the Waymo dataset.

| Focal | EAM | Ego | N    | A    | L    | K    | K360 | W    | avg  |
|-------|-----|-----|------|------|------|------|------|------|------|
|       |     | ✓   | 0.1  | 8.9  | 0.0  | 0.0  | 0.0  | 58.8 | 11.3 |
|       |     | ✓   | 0.0  | 8.4  | 0.0  | 0.0  | 0.0  | 58.3 | 11.1 |
|       | ✓   |     | 0.0  | 5.0  | 0.0  | 0.0  | 0.0  | 59.4 | 10.7 |
|       | ✓   | ✓   | 0.0  | 3.5  | 0.0  | 0.0  | 0.0  | 59.4 | 10.5 |
| ✓     |     |     | 14.5 | 37.8 | 14.3 | 9.4  | 5.6  | 57.7 | 23.2 |
| ✓     |     | ✓   | 24.7 | 39.4 | 33.0 | 21.2 | 13.6 | 57.7 | 31.6 |
| ✓     | ✓   |     | 14.1 | 37.7 | 17.0 | 9.3  | 5.8  | 57.6 | 23.6 |
| ✓     | ✓   | ✓   | 25.4 | 38.2 | 33.6 | 21.2 | 11.7 | 57.6 | 31.3 |

the performance again. This decline can be attributed to a significant amount of discordant data, as illustrated in Figure 1, which provides statistics on the data volume across different datasets.

## 5.5 Per-class and per-location evaluation results

Table 8 and Table 7 are the extended version of Table 2 and Table 3 in the main paper, showing per-class mAP on each datasets. Furthermore, Table 9 shows the evaluation result of best model in Table 3 on each city in each dataset.

## 5.6 Results from surrounding view detection

We conduct extensive experiment under surrounding view settings to better understand the behavior of the detectors. All input images are of 1/4 resolution, and the perception range is bigger, including the area behind our ego car.

**Ablation studies on sensor alignment approaches.** We examine our sensor alignment under the surrounding view settings. In Table 10, DETR3D is trained on Argoverse2, nuScenes and Waymo, and tested in six datasets.

**Data diversity vs. data volume** We test if the model benefits more from data diversity more than data volume. Given that Waymo and nuScene are of similar data volume, we used different percentage of training data from the 2 datasets and test the model on 3 datasets. As shown in Table 11, mixing the data achieves better performance.

Table 5: Multi-dataset training results by DETR3D, beginning with Waymo.

| Setting | src/dst | W    | N    | A    | L    | K    | K360 | avg. |
|---------|---------|------|------|------|------|------|------|------|
| Direct  | W       | 58.8 | 0.1  | 8.9  | 0.0  | 0.0  | 0.0  | 11.3 |
|         | +N      | 60.4 | 38.4 | 11.2 | 0.2  | 0.0  | 0.0  | 18.4 |
|         | +A      | 63.0 | 42.7 | 54.8 | 0.1  | 0.0  | 0.0  | 26.8 |
|         | +L      | 60.2 | 44.4 | 53.1 | 47.3 | 0.0  | 0.0  | 34.2 |
|         | +K      | 63.1 | 45.5 | 53.4 | 49.2 | 44.3 | 1.9  | 42.9 |
|         | +K360   | 61.9 | 46.2 | 53.7 | 49.4 | 39.5 | 29.7 | 46.7 |

Table 6: Results of DETR3D and BEVDet, which are trained on Waymo, using images cropped at different positions during testing.

| Cropped height | [192,992] | [288,1088] | [384,1184] | [480,1280] | Origin |
|----------------|-----------|------------|------------|------------|--------|
| DETR3D         | 56.9      | 59.3       | 59.3       | 59.7       | 57.7   |
| BEVDet         | 20.8      | 30.5       | 36.4       | 31.5       | 39.0   |

Table 7: Multi-dataset training results by DETR3D, beginning with nuScenes (full version). The performance is reported in terms of LET-3D-AP for all, vehicles, pedestrians, and bicycles, denoted as a(b/c/d).

| Setting                       | src/dst | N                     | A                     | L                     | K                     | K360                  | W                     |
|-------------------------------|---------|-----------------------|-----------------------|-----------------------|-----------------------|-----------------------|-----------------------|
| Direct                        | N       | 36.3 (56.7/36.7/15.7) | 0.8 (0.9/1.4/0.3)     | 1.8 (1.6/1.1/2.7)     | 0.0 (0.0/0.0/0.0)     | 0.0 (0.0/0.0/0.0)     | 1.1 (0.6/1.2/1.4)     |
|                               | +A      | 40.5 (60.4/38.9/22.1) | 49.2 (76.0/42.3/29.4) | 0.5 (0.7/0.5/0.3)     | 0.0 (0.0/0.0/0.0)     | 0.0 (0.0/0.0/0.0)     | 5.2 (4.5/4.2/6.9)     |
|                               | +L      | 41.6 (61.0/40.7/23.1) | 50.5 (78.4/42.3/30.9) | 43.7 (74.5/26.3/30.4) | 0.0 (0.0/0.0/0.0)     | 0.0 (0.0/0.0/0.0)     | 3.8 (4.2/4.2/2.9)     |
|                               | +K      | 41.5 (62.7/39.6/22.1) | 49.7 (78.5/42.4/28.3) | 46.0 (75.8/28.1/34.2) | 41.4 (62.1/38.7/23.5) | 1.1 (1.2/1.2/1.0)     | 3.6 (4.3/4.2/2.2)     |
|                               | +K360   | 42.6 (64.2/40.8/22.8) | 54.3 (78.6/43.8/40.6) | 46.8 (76.7/26.5/37.1) | 36.3 (51.3/35.0/22.7) | 29.7 (60.6/8.6/20.0)  | 3.3 (4.2/3.8/1.8)     |
|                               | +W      | 46.2 (66.6/42.7/29.2) | 53.7 (79.8/47.9/33.5) | 49.4 (76.7/33.0/38.4) | 39.5 (54.2/36.1/28.0) | 29.7 (60.6/9.4/19.2)  | 61.9 (82.0/55.4/48.2) |
| Sync Intrinsic                | N       | 40.8 (58.5/42.1/21.8) | 25.5 (45.6/25.1/5.7)  | 18.6 (39.8/14.4/1.6)  | 29.7 (41.1/24.2/23.7) | 18.0 (37.6/11.3/4.9)  | 23.4 (37.4/24.8/7.9)  |
|                               | +A      | 45.5 (64.5/45.0/27.0) | 50.0 (77.9/44.0/28.1) | 25.1 (49.2/18.0/8.1)  | 35.8 (48.1/26.2/33.1) | 21.3 (42.5/15.0/6.5)  | 44.2 (67.9/35.8/28.7) |
|                               | +L      | 46.8 (64.3/47.1/28.9) | 53.2 (79.5/46.6/33.6) | 55.1 (82.6/36.4/46.2) | 37.8 (50.7/30.6/31.9) | 23.1 (44.6/16.9/7.8)  | 45.3 (69.2/37.0/29.6) |
|                               | +K      | 47.4 (64.5/48.0/29.8) | 53.5 (79.3/45.6/35.6) | 53.6 (82.5/34.3/43.9) | 57.8 (77.7/48.7/46.9) | 21.8 (36.4/17.2/11.6) | 44.4 (69.4/37.2/26.7) |
|                               | +K360   | 50.2 (68.0/47.5/34.9) | 54.4 (80.7/48.3/34.3) | 54.0 (83.7/36.4/42.0) | 60.2 (81.9/47.2/51.4) | 39.6 (72.7/16.9/29.3) | 44.7 (71.6/38.2/24.2) |
|                               | +W      | 51.8 (68.2/49.8/37.3) | 55.3 (82.1/48.8/34.9) | 56.6 (84.4/38.4/47.1) | 61.9 (83.0/51.5/51.1) | 40.7 (73.6/19.9/28.7) | 63.7 (83.2/55.0/52.8) |
| Sync Extrinsic and Ego center | N       | 43.1 (63.0/45.0/21.4) | 33.6 (62.4/30.4/7.9)  | 32.8 (60.8/19.3/18.4) | 33.0 (49.0/28.2/21.7) | 18.4 (37.0/12.8/5.5)  | 33.0 (47.8/28.4/22.8) |
|                               | +A      | 52.1 (68.1/50.8/37.4) | 52.7 (77.9/47.3/32.9) | 38.4 (70.4/23.5/21.2) | 42.2 (54.9/33.6/37.9) | 23.2 (43.0/16.5/10.3) | 40.7 (64.1/35.6/22.5) |
|                               | +L      | 52.6 (68.9/50.2/38.6) | 53.2 (79.1/47.4/33.2) | 59.5 (85.6/45.5/47.4) | 46.1 (61.6/37.8/38.9) | 26.1 (47.6/19.7/10.9) | 43.6 (67.1/35.6/28.0) |
|                               | +K      | 51.0 (67.9/51.8/33.3) | 54.7 (79.8/47.7/36.5) | 60.2 (85.6/44.5/50.5) | 63.9 (83.2/58.0/50.6) | 28.4 (48.8/22.9/13.5) | 44.6 (67.1/35.4/31.4) |
|                               | +K360   | 50.0 (70.5/50.4/29.3) | 55.0 (81.4/47.4/36.2) | 59.8 (86.9/43.9/48.4) | 65.0 (85.4/54.5/55.1) | 42.7 (75.5/20.3/32.3) | 45.2 (68.6/36.2/30.9) |
|                               | +W      | 54.8 (72.7/52.5/39.1) | 56.4 (82.3/49.0/38.0) | 60.5 (87.4/45.7/48.4) | 66.8 (85.2/58.1/57.2) | 43.4 (76.3/22.3/31.5) | 62.7 (83.4/56.9/47.9) |

Table 8: Cross-dataset testing results of DETR3D trained on single dataset (full version). The performance is reported in terms of LET-3D-AP for all, vehicles, pedestrians, and bicycles, denoted as a(b/c/d).

| Setting                       | src/dst | N                     | A                     | L                     | K                     | K360                  | W                     |
|-------------------------------|---------|-----------------------|-----------------------|-----------------------|-----------------------|-----------------------|-----------------------|
| Direct                        | N       | 36.3 (56.7/36.7/15.7) | 0.8 (0.9/1.4/0.3)     | 1.8 (1.6/1.1/2.7)     | 0.0 (0.0/0.0/0.0)     | 0.0 (0.0/0.0/0.0)     | 1.1 (0.6/1.2/1.4)     |
|                               | A       | 0.2 (0.1/0.1/0.1)     | 48.0 (73.8/38.7/31.7) | 0.1 (0.0/0.1/0.1)     | 0.0 (0.0/0.1/0.0)     | 0.0 (0.0/0.1/0.0)     | 17.4 (19.7/14.1/18.3) |
|                               | L       | 0.5 (0.9/0.7/0.0)     | 0.1 (0.1/0.1/0.0)     | 37.3 (70.5/16.6/24.9) | 0.4 (0.5/0.7/0.1)     | 0.0 (0.0/0.1/0.0)     | 0.1 (0.0/0.3/0.0)     |
|                               | K       | 2.8 (4.8/3.0/0.5)     | 1.2 (0.9/1.3/1.5)     | 0.0 (0.1/0.1/0.0)     | 24.5 (40.2/25.1/8.3)  | 1.1 (0.9/2.1/0.4)     | 0.7 (0.2/0.4/1.3)     |
|                               | K360    | 0.1 (0.1/0.2/0.0)     | 0.2 (0.0/0.0/0.2)     | 0.0 (0.0/0.0/0.0)     | 3.2 (0.9/6.7/2.2)     | 26.1 (60.2/4.5/13.7)  | 0.1 (0.0/0.1/0.2)     |
|                               | W       | 0.1 (0.0/0.1/0.0)     | 8.9 (14.5/9.2/3.1)    | 0.0 (0.0/0.0/0.0)     | 0.0 (0.0/0.0/0.0)     | 0.0 (0.0/0.0/0.0)     | 58.8 (78.1/50.3/47.9) |
| Sync Intrinsic                | N       | 35.7 (56.1/36.3/14.8) | 21.9 (40.9/19.3/5.3)  | 13.8 (30.4/9.6/1.4)   | 27.1 (41.7/24.6/14.9) | 16.9 (36.4/10.0/4.2)  | 19.2 (32.0/18.9/6.7)  |
|                               | A       | 11.8 (19.1/12.9/3.4)  | 46.8 (73.4/38.2/28.8) | 7.2 (18.2/2.5/1.0)    | 6.4 (10.1/2.1/6.9)    | 5.4 (13.7/1.1/1.5)    | 38.4 (59.2/29.5/26.4) |
|                               | L       | 1.0 (1.8/1.2/0.1)     | 1.3 (3.3/0.4/0.1)     | 44.0 (76.4/20.9/34.6) | 8.1 (17.3/4.7/2.3)    | 5.7 (12.7/2.0/2.4)    | 1.5 (3.2/1.0/0.2)     |
|                               | K       | 1.2 (0.9/1.9/0.7)     | 0.2 (0.4/0.0/0.1)     | 0.6 (0.8/0.8/0.1)     | 24.7 (40.0/26.1/8.0)  | 6.4 (13.8/3.5/1.9)    | 0.1 (0.3/0.0/0.1)     |
|                               | K360    | 14.6 (34.0/9.3/0.4)   | 14.7 (36.4/2.7/4.9)   | 7.3 (20.0/1.6/0.2)    | 34.6 (59.9/25.1/18.9) | 34.7 (69.4/10.0/24.7) | 8.2 (22.7/0.7/1.1)    |
|                               | W       | 14.5 (25.9/13.3/4.4)  | 37.8 (67.3/34.1/11.9) | 14.3 (25.5/8.5/8.8)   | 9.4 (6.3/4.8/17.0)    | 5.6 (13.1/1.1/2.6)    | 57.7 (78.0/50.2/45.0) |
| Sync Extrinsic and Ego center | N       | 43.1 (63.0/45.0/21.4) | 33.6 (62.4/30.4/7.9)  | 32.8 (60.8/19.3/18.4) | 33.0 (49.0/28.2/21.7) | 18.4 (37.0/12.8/5.5)  | 33.0 (47.8/28.4/22.8) |
|                               | A       | 24.4 (42.0/23.0/8.3)  | 48.1 (75.3/41.7/27.3) | 34.1 (61.5/22.4/18.3) | 18.1 (22.0/17.3/15.0) | 8.7 (16.1/3.1/6.8)    | 37.4 (58.4/28.8/24.9) |
|                               | L       | 15.7 (35.1/10.3/1.9)  | 19.6 (42.6/13.1/3.0)  | 47.1 (79.3/21.2/40.8) | 20.0 (38.7/11.5/9.9)  | 12.9 (31.8/4.0/2.9)   | 18.9 (30.2/11.2/15.2) |
|                               | K       | 7.1 (12.6/7.0/0.8)    | 8.7 (19.2/3.8/2.9)    | 10.2 (20.7/4.2/5.6)   | 29.1 (49.5/28.1/9.6)  | 9.3 (20.2/4.9/2.7)    | 2.4 (3.6/2.5/1.1)     |
|                               | K360    | 13.9 (33.2/8.3/0.3)   | 17.7 (41.7/5.6/5.8)   | 16.6 (38.4/4.2/7.3)   | 39.1 (67.6/26.5/23.2) | 36.7 (72.4/10.9/26.6) | 8.4 (18.2/2.8/4.3)    |
|                               | W       | 25.4 (45.0/26.3/5.0)  | 38.2 (68.3/34.6/11.7) | 33.6 (63.3/16.8/20.7) | 21.2 (13.5/25.3/24.7) | 11.7 (25.6/6.2/3.3)   | 57.6 (77.9/50.9/44.2) |

Table 9: Evaluation results per location, using DETR3D with all sensor alignment approaches. The performance is reported in terms of LET-3D-AP for all, vehicles, pedestrians, and bicycles, denoted as a(b/c/d).

| Dataset    | Location                 | LET-3D-AP             |
|------------|--------------------------|-----------------------|
| argoverse2 | ATX                      | 44.6 (69.7/64.3/0.0)  |
|            | DTW                      | 71.5 (79.3/60.3/75.1) |
|            | MIA                      | 46.8 (84.0/41.1/15.2) |
|            | PAO                      | 64.3 (91.6/51.4/49.7) |
|            | PIT                      | 59.9 (82.0/53.2/44.4) |
|            | WDC                      | 39.9 (80.1/39.7/0.0)  |
| kitti      | Germany                  | 66.8 (85.2/58.1/57.2) |
| kitti-360  | Germany                  | 43.3 (76.3/22.3/31.4) |
| lyft       | Palo Alto                | 60.5 (87.4/45.7/48.5) |
| nuscenesc  | boston-seaport           | 61.4 (75.4/51.7/57.1) |
|            | singapore-hollandvillage | 30.3 (67.4/23.4/0.1)  |
|            | singapore-onenorth       | 50.5 (66.8/53.0/31.8) |
|            | singapore-queenstown     | 51.6 (68.5/58.9/27.5) |
| waymo      | other                    | 44.9 (72.4/44.8/17.6) |
|            | phx                      | 63.3 (87.0/55.7/47.1) |
|            | sf                       | 65.1 (83.7/58.8/52.8) |

Table 10: Surrounding view 3D detection results: ablation study on the effectiveness of each module in sensor alignment approaches. All models are trained on AV2, nuScenes, Waymo.

| Focal | EAM | Ego | A    | N    | W    | L    | K    | K360 | avg. |
|-------|-----|-----|------|------|------|------|------|------|------|
|       |     |     | 48.0 | 40.4 | 54.8 | 0.6  | 6.2  | 0.7  | 25.1 |
|       |     | ✓   | 48.6 | 41.0 | 53.8 | 0.0  | 3.6  | 0.0  | 24.5 |
|       | ✓   |     | 49.5 | 39.7 | 54.7 | 1.8  | 7.4  | 1.8  | 25.8 |
|       | ✓   | ✓   | 47.4 | 40.8 | 53.3 | 0.2  | 4.4  | 0.6  | 24.4 |
| ✓     |     |     | 52.2 | 46.5 | 55.2 | 22.2 | 22.0 | 11.0 | 34.9 |
| ✓     |     | ✓   | 50.1 | 47.2 | 54.2 | 30.1 | 36.3 | 22.1 | 40.0 |
| ✓     | ✓   |     | 52.0 | 46.7 | 55.5 | 31.1 | 26.2 | 15.8 | 37.9 |
| ✓     | ✓   | ✓   | 52.1 | 47.5 | 54.8 | 31.4 | 39.7 | 24.0 | 41.6 |

Table 11: Surrounding view 3D detection results: models are trained on different combinations of Waymo and nuScenes.

| test/ train(W+N) | 0.00+1.00 | 0.01+0.99 | 0.10+0.90 | 0.33+0.67 | 0.5+0.5 | 0.67+0.33 | 1.00+0.00 |
|------------------|-----------|-----------|-----------|-----------|---------|-----------|-----------|
| A                | 1.0       | 6.4       | 9.1       | 13.0      | 14.5    | 16.0      | 4.3       |
| N                | 32.5      | 32.5      | 32.3      | 32.1      | 31.5    | 30.4      | 0.2       |
| W                | 0.3       | 23.4      | 36.7      | 45.8      | 45.6    | 47.0      | 46.2      |

Table 12: The original categories in each dataset that we include into the vehicle, pedestrian and bicycle categories.

| Dataset    | Vehicle                                                                                                     | Pedestrian                                   | Bicycle            |
|------------|-------------------------------------------------------------------------------------------------------------|----------------------------------------------|--------------------|
| argoverse2 | REGULAR VEHICLE, LARGE VEHICLE, BUS, BOX TRUCK, TRUCK, MOTORCYCLE, VEHICULAR TRAILER, TRUCK CAB, SCHOOL BUS | PEDESTRIAN, WHEELED RIDER, OFFICIAL SIGNALER | BYCYCLE, BYCYCLIST |
| kitti      | Car, Van, Trunk, Tram                                                                                       | Pedestrian, Person Sitting                   | Cyclist            |
| kitti-360  | bus, car, caravan, motorcycle, trailer, train, truck, unknown vehicle                                       | person                                       | bicycle, rider     |
| lyft       | car, truck, bus, emergency vehicle, other vehicle, motorcycle                                               | pedestrian                                   | bicycle            |
| nuscenesc  | car, truck, construction vehicle, bus, trailer, motorcycle                                                  | pedestrian                                   | bicycle            |
| waymo      | Car                                                                                                         | Pedestrian                                   | Cyclist            |

## References

- [1] B. Wilson, W. Qi, T. Agarwal, J. Lambert, J. Singh, S. Khandelwal, B. Pan, R. Kumar, A. Hartnett, J. K. Pontes, et al. Argoverse 2: Next generation datasets for self-driving perception and forecasting. *arXiv preprint arXiv:2301.00493*, 2023.
- [2] A. Geiger, P. Lenz, C. Stiller, and R. Urtasun. Vision meets robotics: The kitti dataset. *The International Journal of Robotics Research*, 32(11):1231–1237, 2013.
- [3] X. Chen, K. Kundu, Y. Zhu, A. G. Berneshawi, H. Ma, S. Fidler, and R. Urtasun. 3d object proposals for accurate object class detection. *Advances in neural information processing systems*, 28, 2015.
- [4] Y. Liao, J. Xie, and A. Geiger. Kitti-360: A novel dataset and benchmarks for urban scene understanding in 2d and 3d. *IEEE Transactions on Pattern Analysis and Machine Intelligence*, 2022.
- [5] H. Caesar, V. Bankiti, A. H. Lang, S. Vora, V. E. Liong, Q. Xu, A. Krishnan, Y. Pan, G. Baldan, and O. Beijbom. nuscenes: A multimodal dataset for autonomous driving. In *Proceedings of the IEEE/CVF conference on computer vision and pattern recognition*, pages 11621–11631, 2020.
- [6] R. Kesten, M. Usman, J. Houston, T. Pandya, K. Nadhamuni, A. Ferreira, M. Yuan, B. Low, A. Jain, P. Ondruska, et al. Lyft level 5 av dataset 2019. [urlhttps://level5.lyft.com/dataset](https://level5.lyft.com/dataset), 1:3, 2019.
- [7] P. Sun, H. Kretzschmar, X. Dotiwalla, A. Chouard, V. Patnaik, P. Tsui, J. Guo, Y. Zhou, Y. Chai, B. Caine, et al. Scalability in perception for autonomous driving: Waymo open dataset. In *Proceedings of the IEEE/CVF conference on computer vision and pattern recognition*, pages 2446–2454, 2020.
- [8] I. Loshchilov and F. Hutter. Decoupled weight decay regularization. *arXiv preprint arXiv:1711.05101*, 2017.
- [9] J. Huang, G. Huang, Z. Zhu, Y. Ye, and D. Du. Bevdet: High-performance multi-camera 3d object detection in bird-eye-view. *arXiv preprint arXiv:2112.11790*, 2021.
